# Supplementary material
Source: HighWire-hosted journal article supplement (http://www.cmajopen.ca/highwire/filestream/80946/field_highwire_adjunct_files/2/open-2015-0056-original-submission.pdf)
Supplement: open-2015-0056-original-submission.pdf [file open-2015-0056-original-submission.pdf]

1  
2  
3 **Cost-Effectiveness of Clopidogrel, Prasugrel, and Ticagrelor for Dual Antiplatelet**  
4  
5  
6 **Therapy after Acute Coronary Syndromes: a decision-analytic model**

7  
8 **Running title: Cost-effectiveness of prasugrel and ticagrelor**

9  
10 Husam Abdel-Qadir MD<sup>1,3,4,5</sup>\*, Idan Roifman MD<sup>1,2,3\*</sup>, Harindra C. Wijeyesundera MD  
11  
12 PHD<sup>1,2,3,5</sup>

13  
14  
15 \*Drs. Abdel-Qadir and Roifman contributed equally to this work and should be  
16  
17 considered co-first authors  
18

19  
20 <sup>1</sup> Institute for Clinical Evaluative Sciences (ICES)

21  
22 <sup>2</sup> Schulich Heart Program and the Sunnybrook Research Institute

23  
24 <sup>3</sup> Institute for Health Policy, Management and Evaluation, University of Toronto

25  
26  
27 <sup>4</sup> Women's College Hospital

28  
29 <sup>5</sup> Li Ka Shing Knowledge Institute, St. Michael's Hospital

30  
31 University of Toronto

32  
33 Toronto, Ontario, Canada

34  
35  
36 **Abstract: 231 words**

37  
38  
39 **Manuscript: 2480 words**

40  
41  
42  
43 **Correspondence:**

44 Harindra Wijeyesundera

45 Schulich Heart Center, Sunnybrook Health Sciences Center

46  
47 2075 Bayview Avenue, Suite A202

48  
49 Toronto, ON M4N 3M5

50  
51 Tel: 416-480-4527

52  
53 Fax:(416) 480-4657

54  
55 harindra.wijeyesundera@sunnybrook.ca

## Abstract

**Background:** The use of prasugrel or ticagrelor in combination with aspirin after acute coronary syndromes (ACS) improves clinical outcomes relative to clopidogrel. There have been no head-to-head analyses directly comparing the cost-effectiveness of these three agents. Thus, we conducted an economic analysis evaluating one year of treatment with clopidogrel, prasugrel or ticagrelor in patients post ACS.

**Methods:** We developed a fully probabilistic Markov cohort decision-analytic model using a lifetime horizon, from the perspective of the Ontario Ministry of Health. The model incorporated risks of death, recurrent ACS, heart failure, major bleeds and other adverse effects of therapy. Data on probabilities and utilities were obtained from published literature where available. The primary outcome was quality adjusted life-years (QALYs).

**Results:** Treatment with clopidogrel was associated with the lowest effectiveness at 7.41 QALYs (95% CI 1.05-14.79) at a cost of \$39,601 (95% CI 8,434-111,186). Ticagrelor was associated with an effectiveness of 7.50 QALYs (95% CI 1.13-14.84) at a cost of \$40,649 (95% CI 9,327-111,881). The ICER for ticagrelor relative to clopidogrel was \$12,205 per QALY gained. Prasugrel had an ICER of \$57,630 per QALY gained relative to clopidogrel. Ticagrelor was the preferred option in 90% of simulations at a willingness to pay threshold of \$50,000/QALY gained.

**Interpretation:** Ticagrelor was the most cost effective agent when used as part of dual anti-platelet therapy post ACS. This conclusion was robust to wide variations in model parameters.

**Keywords: Cardiac Disease, Coronary cost-effectiveness analysis, myocardial infarction, antiplatelet drugs, prasugrel, health economics, ticagrelor, clopidogrel**

Confidential

1  
2  
3  
4  
5  
6  
7  
8  
9  
10  
11  
12  
13  
14  
15  
16  
17  
18  
19  
20  
21  
22  
23  
24  
25  
26  
27  
28  
29  
30  
31  
32  
33  
34  
35  
36  
37  
38  
39  
40  
41  
42  
43  
44  
45  
46  
47  
48  
49  
50  
51  
52  
53  
54  
55  
56  
57  
58  
59  
60

## Background

Contemporary guidelines recommend dual antiplatelet therapy with acetylsalicylic acid and a P2Y12 antagonist for one year after acute coronary syndrome (ACS)(1-3). The Clopidogrel in Unstable Angina to Prevent Recurrent Events (CURE) Trial demonstrated that clopidogrel reduces adverse cardiovascular events when added to acetylsalicylic acid for twelve months after an ACS(1). However, the individual response to clopidogrel is limited by various factors (4). This has prompted research that culminated in the development of prasugrel and ticagrelor, novel P2Y12 antagonists with superior antiplatelet properties compared to clopidogrel.

The Prasugrel–Thrombolysis in Myocardial Infarction (TRITON–TIMI) 38 trial demonstrated that prasugrel use after an ACS significantly reduced the risk of recurrent ACS, including stent thrombosis, relative to clopidogrel(5). Similarly, the Platelet Inhibition and Patient Outcomes trial (PLATO) demonstrated that ticagrelor reduced the risk of all-cause death after an ACS relative to clopidogrel(6). Both agents increased bleeding rates, with a more prominent increase in risk with prasugrel (5,6). In addition to these clinical tradeoffs, both prasugrel and ticagrelor have substantially higher acquisition costs than clopidogrel (7, 8).

Recent American College of Cardiology/ American Heart Association guidelines emphasize the importance of evaluating the clinical benefits of health care interventions in the context of their costs (9, 10). This enables delivery of the highest quality health care while optimizing scarce resources. While cost-effectiveness analyses have compared clopidogrel individually with prasugrel (11) and ticagrelor (12), none have directly compared all three agents against each other. Decision-analytic modeling is well-suited to

1  
2  
3 addressing this gap in knowledge, as it provides an explicit framework to integrate all  
4 available evidence. Accordingly, we conducted an economic analysis comparing the  
5  
6 cost-effectiveness of 12 months of treatment with clopidogrel, prasugrel and ticagrelor in  
7  
8 post ACS patients, including both STEMI and NSTEMI-ACS.  
9  
10

## 11 **Methods**

### 12 *Overview and Study Design*

13  
14  
15 We developed a fully probabilistic Markov cohort state-transition model, with a  
16  
17 life-time horizon. Cycle length was set at one month. The model was analyzed from the  
18  
19 perspective of the Ontario Ministry of Health and Long-Term Care. The three alternatives  
20  
21 evaluated in the model were treatment with ticagrelor, prasugrel or clopidogrel for 12  
22  
23 months in patients revascularized with percutaneous coronary intervention after an ACS  
24  
25 (13-15). Effectiveness was expressed as quality-adjusted life years (QALYs), while costs  
26  
27 were adjusted to 2012 Canadian dollars using the general consumer price index.  
28  
29  
30  
31  
32

33  
34 Incremental-cost effectiveness ratios (ICERs) were calculated by ordering the  
35  
36 three strategies from lowest to highest lifetime cost, consistent with economic analysis  
37  
38 conventions. We determined the ICER based on the incremental cost and effectiveness  
39  
40 compared with the next less expensive treatment strategy. If a strategy was more  
41  
42 effective than a more expensive alternative, it was a dominant strategy. If the ICER of a  
43  
44 strategy was lower than its less expensive alternative, it extendedly dominated that  
45  
46 alternative, as it represented more efficient value per unit cost. Based on guidelines, an  
47  
48 alternative was considered to be of value if its ICER was less than \$50,000 per QALY  
49  
50 gained (1\*per capita gross domestic product/GDP) (9, 10). All utilities and costs were  
51  
52 discounted at a rate of 5% per year according to current Canadian recommendations (16).  
53  
54  
55  
56  
57  
58  
59  
60

### *Model structure*

A simplified model schematic is presented in Figure 1. Patients in the model progress through cycles of one-month duration. All patients begin with dual antiplatelet therapy with acetylsalicylic acid, combined with one of clopidogrel, prasugrel or ticagrelor, with the objective of completing 12 months of therapy post ACS. We assumed that every patient was successfully revascularized at the time of index PCI for their ACS.

Within any one-month cycle patients could die, develop heart failure or become free of it. Events that occurred within each cycle included recurrent ACS (with possible stent thrombosis), major bleeding, or minor side effects (minor bleeds and ticagrelor-associated bradycardia and dyspnea). Discontinuation of assigned dual antiplatelet strategy was factored into our model using rates derived from clinical trial data.

It was assumed that if patients had to discontinue clopidogrel within the first 12 months post index event, it would be replaced with prasugrel or ticagrelor with a 50% probability of receiving each agent. If patients were initially on one of prasugrel or ticagrelor and had to discontinue it within 12 months of an ACS, they were transitioned to clopidogrel. If patients had to discontinue two P2Y12 antagonists, they were classified as dual antiplatelet intolerant and maintained on single antiplatelet therapy with aspirin. Dual antiplatelet therapy intolerant patients were modeled to have higher risks of recurrent ACS and death for the first 12 months post ACS.

After 12 months of dual antiplatelet therapy without recurrent events, patients were transitioned to single antiplatelet therapy. If an ACS recurred, patients were transitioned to the last dual antiplatelet strategy they tolerated. Patients who were dual antiplatelet therapy intolerant were treated with angioplasty without stenting, and

1  
2  
3 maintained on acetylsalicylic acid alone. These patients had a higher risk of recurrent  
4  
5 ACS for the subsequent six months.  
6  
7

### 8 *Base Case*

9  
10 The baseline characteristics of our base case were derived from the weighted  
11 means of the characteristics of patients enrolled in the TRITON– TIMI 38, the Dose  
12 confirmation Study assessing anti-Platelet Effects of AZD6140 vs. clopidogrel in non-  
13 ST segment Elevation myocardial infarction (DISPERSE-2) study and the PLATO  
14 randomized controlled trials (5, 6, 8, 17). The mean age was 62 years; 61% were male,  
15 and 24% were diabetic.  
16  
17  
18  
19  
20  
21  
22  
23

### 24 *Probabilities*

25  
26 Probabilities were obtained from the published literature and are listed in Table 1.  
27  
28 All transition probabilities for death, stent thrombosis, development of heart failure and  
29 recurrent ACS were time-dependent based on patient age and time from the most recent  
30 ACS event.  
31  
32  
33  
34  
35

#### 36 *a. ACS, stent thrombosis and bleeding*

37  
38 The incidence of recurrent ACS, stent thrombosis, and TIMI major bleeding with  
39 clopidogrel was derived from the weighted mean of the event rates in the clopidogrel arm  
40 of these trials. The incidence of these events among patients treated with prasugrel or  
41 ticagrelor was modeled by multiplying the baseline rate in clopidogrel-treated patients  
42 with the corresponding hazard ratio for each event as determined from each agent's Phase  
43 III trial data. Rates of minor bleeding and other side effects, as well rates of  
44 discontinuation, were determined directly for each agent using the TRITON and PLATO  
45 trial data.  
46  
47  
48  
49  
50  
51  
52  
53  
54  
55  
56  
57  
58  
59  
60

1  
2  
3 *b. Probability of death*  
4

5 The baseline risk of death for patients on aspirin monotherapy was derived from  
6 age-and sex specific Ontario life tables, and modified by a time-dependent change in the  
7 hazard for death based on time since the most recent myocardial infarction (18) and the  
8 presence/ absence of heart failure. In each treatment arm, the hazard of death was  
9 modified based on the reported hazard ratio for death reported in Phase III trials of  
10 prasugrel, ticagrelor and clopidogrel (See Table 2) (4-6, 19).  
11  
12  
13  
14  
15  
16  
17  
18

19  
20 *Costs*  
21

22 Costs and utilities utilized in our study are summarized in Table 3. Costs were  
23 reported in 2012 Canadian dollars. Unit costs for medications were obtained from the  
24 Ontario Drug Benefits (ODB) Formulary (20). We assumed dispensing fees of once per  
25 3 months (3 months is the maximum time frame that pharmacies prescribe medications  
26 under the Ontario Drug Benefit Plan). We employed monthly treatment costs of \$20.02  
27 with clopidogrel, \$80.96 with prasugrel, and \$90.10 for ticagrelor. The Ontario Case  
28 Costing Initiative (OCCI) was used to determine hospitalization costs (21). Physician  
29 costs were obtained from the 2012 Ontario Schedule of Benefits for Physician Services  
30 (22). For each ACS, we assumed there was an emergency physician consultation, a  
31 cardiology consultation, and interventional cardiology consultation, a diagnostic  
32 angiogram and percutaneous coronary intervention, a transthoracic echocardiogram, and  
33 3 follow up visits by the attending cardiologist.  
34  
35  
36  
37  
38  
39  
40  
41  
42  
43  
44  
45  
46  
47  
48  
49

50 *Utilities*  
51

52 We used previously described utility values for the post MI state, with and  
53 without heart failure, as well as for acute coronary syndromes, major and minor bleeding  
54  
55  
56  
57  
58  
59  
60



1  
2  
3 16-18,20-24. The utility of other non-major bleeding related side effects were assumed to be  
4  
5 equivalent to those of minor bleeding (19-21, 23-27). The utility of twice a day dosing,  
6  
7 which is necessary for ticagrelor, was assumed to be 0.999.  
8  
9

### 10 *Analysis*

11  
12 The model was fully probabilistic, with all input parameters (probabilities,  
13  
14 utilities and costs) expressed as a distribution, with the mean/expected value and  
15  
16 confidence intervals derived from the literature (See Tables 1-3). If a confidence interval  
17  
18 was not available, we used a conservative estimate of the variance being 1/3 of the mean  
19  
20 (28). For probabilities and utilities, we used beta distributions, while gamma distributions  
21  
22 were used for costs, and log-normal distributions for hazard ratios. We ran 10,000  
23  
24 simulations of the model, with parameter values in each simulation based on random  
25  
26 draws from each of the distributions in the model. Our final outputs are based on the  
27  
28 means of the results from the 10,000 simulations. This probabilistic analysis allows for  
29  
30 the full incorporation of the uncertainty of the input parameters. In addition, we  
31  
32 expressed the degree of uncertainty by plotting a cost-effectiveness acceptability curve,  
33  
34 which illustrates the proportion of the 10,000 simulations in which clopidogrel, prasugrel  
35  
36 or ticagrelor was the preferred option at different willingness to pay thresholds.  
37  
38  
39  
40  
41  
42

### 43 *Sensitivity Analyses*

44  
45 We performed one-way sensitivity analyses on all input parameters, to determine  
46  
47 the robustness of our model. The ranges of the one-way sensitivity analyses were based  
48  
49 on 95% confidence intervals determined by the distributions used for the probabilistic  
50  
51 analysis. Given the computation intensity of the probabilistic analyses, one-way  
52  
53 sensitivity analyses were conducted deterministically (summarized in Appendix 1).  
54  
55  
56  
57  
58  
59  
60

1  
2  
3 The model was constructed using TreeAge Pro 2013 (TreeAge Software, Inc.,  
4 Williamstown, Massachusetts). Computation was conducted using 64 core cloud  
5  
6 computing with Amazon Web Services (AWS).  
7  
8  
9

## 10 **Results**

### 11 *Base case cost effectiveness analysis*

12  
13 Treatment with clopidogrel yielded the lowest effectiveness at 7.41 QALYs (95%  
14 CI 1.05-14.79), as well as the lowest cost at \$39,601 (95% CI 8,434-111,186). Prasugrel  
15 had an effectiveness of 7.43 QALYs (95% CI 1.06-14.79) at a cost of \$40,422 (95% CI  
16 9,002-111,881), for an ICER of \$57,630 per QALY gained, compared to clopidogrel.  
17  
18 Ticagrelor was associated with an effectiveness of 7.50 QALYs (95% CI 1.13-14.84) at a  
19 cost of \$40,649 (95% CI 9,327-111,881). This translated to an ICER of \$3,167 per  
20 QALY gained, when compared to prasugrel. Therefore, prasugrel was extendedly  
21 dominated by ticagrelor. When compared to clopidogrel, the ICER of ticagrelor was  
22 \$12,205 per QALY gained (see Table 4). At a willingness to pay (WTP) threshold of  
23 \$50,000/QALY, 90% of the 10,000 simulations showed that ticagrelor was the preferred  
24 agent. When the WTP threshold was \$100,000/QALY, 92% of the simulations showed  
25 ticagrelor to be the preferred strategy (see figure 2).  
26  
27  
28  
29  
30  
31  
32  
33  
34  
35  
36  
37  
38  
39  
40  
41  
42

### 43 *One-way sensitivity analyses*

44  
45 Ticagrelor was the most cost effective agent throughout the range of most  
46 parameters values in one-way sensitivity analyses. The conclusion was only sensitive to  
47 variations in the value of the hazard ratio of death associated with ticagrelor relative to  
48 clopidogrel. The ICER associated with ticagrelor relative to clopidogrel exceeded  
49 \$50,000/QALY when the hazard ratio was greater than 0.89.  
50  
51  
52  
53  
54  
55  
56  
57  
58  
59  
60

## Interpretation

This comparison of clopidogrel, prasugrel, and ticagrelor suggests that ticagrelor is the most cost-effective P2Y<sub>12</sub> antagonist for use in combination with acetylsalicylic acid post-PCI after an ACS. This conclusion was relatively robust to variation in the values of important model parameters, with 90% of simulations supporting a preference for ticagrelor.

Prasugrel and ticagrelor are novel P2Y<sub>12</sub> receptor antagonists. Prasugrel is a potent antiplatelet agent that substantially reduces the risk of recurrent ACS and stent thrombosis. In fact, an indirect network meta-analysis demonstrates it to be more effective than ticagrelor at reducing stent thrombosis with an estimated OR of 0.635 (95% CI 0.433–0.932)(4). However, this comes at an increased risk of bleeding. The TRITON-TIMI 38 study indicated that the risks for any bleeding, as well as TIMI major bleeds, were higher with prasugrel relative to clopidogrel, with hazard ratios of 1.46 and 1.31 respectively (5). The aforementioned network meta-analysis suggests that this higher bleeding risk persists in comparisons with ticagrelor, with an OR of 1.43 (1.10–1.86) (4). Ticagrelor on the other hand appears to be less potent than prasugrel with respect to reduction of recurrent ACS and stent thrombosis, but is associated with a less substantial increase in bleeding risk. Importantly, it is associated with a significant reduction in all-cause mortality relative to clopidogrel with a hazard ratio of 0.78. This may be a consequence of a more optimal balance between these two competing risks. However, other pleiotropic mechanisms such as promotion of endothelial adenosine activity on the

1  
2  
3 endothelium have been postulated to explain the survival advantage that is unique to this  
4  
5 agent (29).  
6  
7

8 Traditional cardiovascular treatment guidelines have not incorporated resource  
9  
10 utilization and value considerations into their recommendations. However, given the  
11  
12 finite available healthcare resources and the increasing costs of providing health services,  
13  
14 there has been a recent emphasis on assessment of the cost and value of healthcare  
15  
16 interventions. A recent ACC/AHA statement emphasized the importance of considering  
17  
18 both cost and value when making healthcare decisions as well as outlining its role in the  
19  
20 future of cardiovascular research (9, 10). While prasugrel and ticagrelor, are clearly  
21  
22 efficacious, it is currently unclear whether this is offset by their increased cost. The  
23  
24 question remains whether or not they provide added value over clopidogrel.  
25  
26  
27  
28

29 While there have been economic analyses assessing clopidogrel, prasugrel and  
30  
31 ticagrelor, none have previously compared all three (11, 12, 30). It is important to  
32  
33 determine the most cost-effective option among these three agents, which are all  
34  
35 presently available to clinicians and policy makers. ICERs of <100,000/QALY are  
36  
37 currently defined as having intermediate values and those with ICERs of <50,000/QALY  
38  
39 are thought to provide high value (9, 10). In this analysis, ticagrelor was the most cost  
40  
41 effective strategy in 92% and 90% of the simulations at a WTP of 100,000/QALY and  
42  
43 \$50,000/QALY respectively. This means that the model conclusions are stable to a wide  
44  
45 range of variability in the parameters used in the model.  
46  
47  
48  
49

50 Our conclusions support current NSTEMI-ACS guidelines that indicate that it is  
51  
52 reasonable to consider ticagrelor in preference to clopidogrel for dual antiplatelet therapy  
53  
54 (class IIa indication) (31, 32). In contrast, current STEMI guidelines provide no  
55  
56  
57  
58  
59  
60

1  
2  
3 preference for one agent over another (33, 34). This analysis provides additional cost-  
4 effectiveness data to guide decisions by hospitals and third party payers about the  
5 adoption of ticagrelor in lieu of clopidogrel. We anticipate that this information will also  
6 be useful to authors of future treatment guidelines.  
7  
8  
9  
10  
11

12  
13 Limitations of our study should be mentioned. First, our model is specific for  
14 ACS patients who are treated with PCI; we cannot extrapolate our conclusions to those  
15 who are treated medically. Second, we simplified the modeling of adverse effects by  
16 assuming that minor bleeding carries a similar utility decrement as ticagrelor-associated  
17 bradycardia and dyspnea. Finally, our conclusions are limited to the framework within  
18 which we modeled the lifetime course post-ACS and different conclusions may be drawn  
19 if this were modeled differently.  
20  
21  
22  
23  
24  
25  
26  
27  
28

### 29 *Conclusions*

30  
31  
32 This cost-effectiveness analysis indicates that ticagrelor is the most cost-effective  
33 P2Y12 antagonist when used in combination with aspirin post ACS. These results may  
34 aid decision makers and individual clinicians in both recommending and ultimately  
35 selecting the appropriate P2Y12 antagonist in conjunction with aspirin as dual antiplatelet  
36 therapy post ACS.  
37  
38  
39  
40  
41  
42  
43  
44  
45

### 46 **Funding Sources**

47  
48 Dr. Wijeyesundera is supported by a Distinguished Clinician Scientist Award from the  
49 Heart and Stroke Foundation of Canada.  
50  
51

### 52 **Disclosures**

1  
2  
3  
4  
5  
6  
7  
8  
9  
10  
11  
12  
13  
14  
15  
16  
17  
18  
19  
20  
21  
22  
23  
24  
25  
26  
27  
28  
29  
30  
31  
32  
33  
34  
35  
36  
37  
38  
39  
40  
41  
42  
43  
44  
45  
46  
47  
48  
49  
50  
51  
52  
53  
54  
55  
56  
57  
58  
59  
60

The authors have no conflicts of interest to declare.

Confidential

## References

1. Yusuf S, Zhao F, Mehta SR, Chrolavicius S, Tognoni G, Fox KK. Effects of clopidogrel in addition to aspirin in patients with acute coronary syndromes without ST-segment elevation. *The New England journal of medicine*. 2001;345(7):494-502. Epub 2001/08/25.
2. Pride YB, Wiviott SD, Buros JL, Zorkun C, Tariq MU, Antman EM, et al. Effect of prasugrel versus clopidogrel on outcomes among patients with acute coronary syndrome undergoing percutaneous coronary intervention without stent implantation: a TRIal to assess Improvement in Therapeutic Outcomes by optimizing platelet inhibition with prasugrel (TRITON)-Thrombolysis in Myocardial Infarction (TIMI) 38 substudy. *American heart journal*. 2009;158(3):e21-6. Epub 2009/08/25.
3. Wiviott SD, Antman EM, Gibson CM, Montalescot G, Riesmeyer J, Weerakkody G, et al. Evaluation of prasugrel compared with clopidogrel in patients with acute coronary syndromes: design and rationale for the TRIal to assess Improvement in Therapeutic Outcomes by optimizing platelet Inhibition with prasugrel Thrombolysis In Myocardial Infarction 38 (TRITON-TIMI 38). *American heart journal*. 2006;152(4):627-35. Epub 2006/09/26.
4. Biondi-Zoccai G, Lotrionte M, Agostoni P, Abbate A, Romagnoli E, Sangiorgi G, et al. Adjusted indirect comparison meta-analysis of prasugrel versus ticagrelor for patients with acute coronary syndromes. *International journal of cardiology*. 2011;150(3):325-31. Epub 2010/09/11.
5. Wiviott SD, Braunwald E, McCabe CH, Montalescot G, Ruzyllo W, Gottlieb S, et al. Prasugrel versus clopidogrel in patients with acute coronary syndromes. *The New England journal of medicine*. 2007;357(20):2001-15. Epub 2007/11/06.
6. Wallentin L, Becker RC, Budaj A, Cannon CP, Emanuelsson H, Held C, et al. Ticagrelor versus clopidogrel in patients with acute coronary syndromes. *The New England journal of medicine*. 2009;361(11):1045-57. Epub 2009/09/01.
7. O'Donoghue M, Antman EM, Braunwald E, Murphy SA, Steg PG, Finkelstein A, et al. The efficacy and safety of prasugrel with and without a glycoprotein IIb/IIIa inhibitor in patients with acute coronary syndromes undergoing percutaneous intervention: a TRITON-TIMI 38 (Trial to Assess Improvement in Therapeutic Outcomes by Optimizing Platelet Inhibition With Prasugrel-Thrombolysis In Myocardial Infarction 38) analysis. *Journal of the American College of Cardiology*. 2009;54(8):678-85. Epub 2009/08/15.
8. James S, Angiolillo DJ, Cornel JH, Erlinge D, Husted S, Kontny F, et al. Ticagrelor vs. clopidogrel in patients with acute coronary syndromes and diabetes: a substudy from the PLATElet inhibition and patient Outcomes (PLATO) trial. *European heart journal*. 2010;31(24):3006-16. Epub 2010/08/31.
9. Anderson JL, Heidenreich PA, Barnett PG, Creager MA, Fonarow GC, Gibbons RJ, et al. ACC/AHA statement on cost/value methodology in clinical practice guidelines and performance measures: a report of the American College of Cardiology/American Heart Association Task Force on Performance Measures and Task Force on Practice Guidelines. *Journal of the American College of Cardiology*. 2014;63(21):2304-22. Epub 2014/04/01.

- 1  
2  
3  
4  
5  
6  
7  
8  
9  
10  
11  
12  
13  
14  
15  
16  
17  
18  
19  
20  
21  
22  
23  
24  
25  
26  
27  
28  
29  
30  
31  
32  
33  
34  
35  
36  
37  
38  
39  
40  
41  
42  
43  
44  
45  
46  
47  
48  
49  
50  
51  
52  
53  
54  
55  
56  
57  
58  
59  
60
10. Anderson JL, Heidenreich PA, Barnett PG, Creager MA, Fonarow GC, Gibbons RJ, et al. ACC/AHA statement on cost/value methodology in clinical practice guidelines and performance measures: a report of the American College of Cardiology/American Heart Association Task Force on Performance Measures and Task Force on Practice Guidelines. *Circulation*. 2014;129(22):2329-45. Epub 2014/03/29.
11. Mahoney EM, Wang K, Arnold SV, Proskorovsky I, Wiviott S, Antman E, et al. Cost-effectiveness of prasugrel versus clopidogrel in patients with acute coronary syndromes and planned percutaneous coronary intervention: results from the trial to assess improvement in therapeutic outcomes by optimizing platelet inhibition with Prasugrel-Thrombolysis in Myocardial Infarction TRITON-TIMI 38. *Circulation*. 2010;121(1):71-9. Epub 2009/12/23.
12. Nikolic E, Janzon M, Hauch O, Wallentin L, Henriksson M. Cost-effectiveness of treating acute coronary syndrome patients with ticagrelor for 12 months: results from the PLATO study. *European heart journal*. 2013;34(3):220-8. Epub 2012/06/22.
13. Anderson JL, Adams CD, Antman EM, Bridges CR, Califf RM, Casey DE, Jr., et al. 2011 ACCF/AHA Focused Update Incorporated Into the ACC/AHA 2007 Guidelines for the Management of Patients With Unstable Angina/Non-ST-Elevation Myocardial Infarction: a report of the American College of Cardiology Foundation/American Heart Association Task Force on Practice Guidelines. *Circulation*. 2011;123(18):e426-579. Epub 2011/03/30.
14. Bell AD, Roussin A, Cartier R, Chan WS, Douketis JD, Gupta A, et al. The use of antiplatelet therapy in the outpatient setting: Canadian Cardiovascular Society guidelines. *The Canadian journal of cardiology*. 2011;27 Suppl A:S1-59. Epub 2011/06/10.
15. Bell AD, Roussin A, Cartier R, Chan WS, Douketis JD, Gupta A, et al. The use of antiplatelet therapy in the outpatient setting: Canadian Cardiovascular Society Guidelines Executive Summary. *The Canadian journal of cardiology*. 2011;27(2):208-21. Epub 2011/04/05.
16. Guidelines for the Economic Evaluation of Health Technologies: Canada. 3rd Edition. Ottawa, Ontario, Canada: Canadian Agency for Drugs and Technologies in Health; 2006.
17. Cannon CP, Husted S, Harrington RA, Scirica BM, Emanuelsson H, Peters G, et al. Safety, tolerability, and initial efficacy of AZD6140, the first reversible oral adenosine diphosphate receptor antagonist, compared with clopidogrel, in patients with non-ST-segment elevation acute coronary syndrome: primary results of the DISPERSE-2 trial. *Journal of the American College of Cardiology*. 2007;50(19):1844-51. Epub 2007/11/06.
18. Vaccaro O, Eberly LE, Neaton JD, Yang L, Riccardi G, Stamler J. Impact of diabetes and previous myocardial infarction on long-term survival: 25-year mortality follow-up of primary screenees of the Multiple Risk Factor Intervention Trial. *Archives of internal medicine*. 2004;164(13):1438-43. Epub 2004/07/14.
19. Mehta SR, Yusuf S, Peters RJ, Bertrand ME, Lewis BS, Natarajan MK, et al. Effects of pretreatment with clopidogrel and aspirin followed by long-term therapy



1  
2  
3 in patients undergoing percutaneous coronary intervention: the PCI-CURE study.  
4 Lancet. 2001;358(9281):527-33. Epub 2001/08/25.

5  
6 20. Ontario Ministry of Health and Long Term Care Web Site. Drugs funded by  
7 the Ontario Drug Benefit Program. 2013 [cited 2013 December 1]; Available from:  
8 [http://www.health.gov.on.ca/english/providers/program/drugs/odbf\\_eformulary.html](http://www.health.gov.on.ca/english/providers/program/drugs/odbf_eformulary.html).

9  
10 21. Ontario Case Costing Initiative. 2013 [cited 2013 December 1]; Available  
11 from: <http://www.occp.com/mainPage.htm>.

12  
13 22. Schedule of Benefits for Physician Services Under the Health Insurance Act.  
14 Ontario Ministry of Health and Long Term Care Website; 2012 [cited 2013 Dec 1];  
15 Available from:

16  
17 [http://www.health.gov.on.ca/english/providers/programs/ohip/sob/physserv/physserv\\_nm.html](http://www.health.gov.on.ca/english/providers/programs/ohip/sob/physserv/physserv_nm.html).

18  
19 23. Tsevat J, Goldman L, Lamas GA, Pfeffer MA, Chapin CC, Connors KF, et al.  
20 Functional status versus utilities in survivors of myocardial infarction. Medical care.  
21 1991;29(11):1153-9. Epub 1991/11/01.

22  
23 24. Holmes KW, Maslen CL, Kindem M, Kroner BL, Song HK, Ravekes W, et al.  
24 GenTAC registry report: gender differences among individuals with genetically  
25 triggered thoracic aortic aneurysm and dissection. American journal of medical  
26 genetics Part A. 2013;161A(4):779-86. Epub 2013/02/28.

27  
28 25. Coleman CI, Straznitskas AD, Sobieraj DM, Kluger J, Anglade MW. Cost-  
29 effectiveness of clopidogrel plus aspirin for stroke prevention in patients with atrial  
30 fibrillation in whom warfarin is unsuitable. The American journal of cardiology.  
31 2012;109(7):1020-5. Epub 2012/01/10.

32  
33 26. Friedel H, Delges A, Clouth J, Trautvetter DT. Expenditures of the German  
34 statutory health insurance system for patients suffering from acute coronary  
35 syndrome and treated with percutaneous coronary intervention. The European  
36 journal of health economics : HEPAC : health economics in prevention and care.  
37 2010;11(5):449-55. Epub 2009/09/24.

38  
39 27. McMurray JJ, Andersson FL, Stewart S, Svensson K, Solal AC, Dietz R, et al.  
40 Resource utilization and costs in the Candesartan in Heart failure: Assessment of  
41 Reduction in Mortality and morbidity (CHARM) programme. European heart journal.  
42 2006;27(12):1447-58. Epub 2006/06/07.

43  
44 28. Singh SM, Micieli A, Wijeyesundera HC. Economic evaluation of percutaneous  
45 left atrial appendage occlusion, dabigatran, and warfarin for stroke prevention in  
46 patients with nonvalvular atrial fibrillation. Circulation. 2013;127(24):2414-23.  
47 Epub 2013/05/24.

48  
49 29. Serebruany VL. Adenosine release: a potential explanation for the benefits of  
50 ticagrelor in the PLATElet inhibition and clinical outcomes trial? American heart  
51 journal. 2011;161(1):1-4. Epub 2010/12/21.

52  
53 30. Mahoney EM, Mehta S, Yuan Y, Jackson J, Chen R, Gabriel S, et al. Long-term  
54 cost-effectiveness of early and sustained clopidogrel therapy for up to 1 year in  
55 patients undergoing percutaneous coronary intervention after presenting with  
56 acute coronary syndromes without ST-segment elevation. American heart journal.  
57 2006;151(1):219-27. Epub 2005/12/22.

- 1  
2  
3  
4  
5  
6  
7  
8  
9  
10  
11  
12  
13  
14  
15  
16  
17  
18  
19  
20  
21  
22  
23  
24  
25  
26  
27  
28  
29  
30  
31  
32  
33  
34  
35  
36  
37  
38  
39  
40  
41  
42  
43  
44  
45  
46  
47  
48  
49  
50  
51  
52  
53  
54  
55  
56  
57  
58  
59  
60
31. Amsterdam EA, Wenger NK, Brindis RG, Casey DE, Jr., Ganiats TG, Holmes DR, Jr., et al. 2014 AHA/ACC Guideline for the Management of Patients With Non-ST-Elevation Acute Coronary Syndromes: A Report of the American College of Cardiology/American Heart Association Task Force on Practice Guidelines. *Circulation*. 2014. Epub 2014/09/25.
  32. Amsterdam EA, Wenger NK, Brindis RG, Casey DE, Jr., Ganiats TG, Holmes DR, Jr., et al. 2014 AHA/ACC Guideline for the Management of Patients With Non-ST-Elevation Acute Coronary Syndromes: Executive Summary: A Report of the American College of Cardiology/American Heart Association Task Force on Practice Guidelines. *Journal of the American College of Cardiology*. 2014. Epub 2014/09/28.
  33. O'Gara PT, Kushner FG, Ascheim DD, Casey DE, Jr., Chung MK, de Lemos JA, et al. 2013 ACCF/AHA guideline for the management of ST-elevation myocardial infarction: a report of the American College of Cardiology Foundation/American Heart Association Task Force on Practice Guidelines. *Journal of the American College of Cardiology*. 2013;61(4):e78-140. Epub 2012/12/22.
  34. O'Gara PT, Kushner FG, Ascheim DD, Casey DE, Jr., Chung MK, de Lemos JA, et al. 2013 ACCF/AHA guideline for the management of ST-elevation myocardial infarction: a report of the American College of Cardiology Foundation/American Heart Association Task Force on Practice Guidelines. *Circulation*. 2013;127(4):e362-425. Epub 2012/12/19.
  35. Kelly DJ, Gershlick T, Witzembichler B, Guagliumi G, Fahy M, Dangas G, et al. Incidence and predictors of heart failure following percutaneous coronary intervention in ST-segment elevation myocardial infarction: the HORIZONS-AMI trial. *American heart journal*. 2011;162(4):663-70. Epub 2011/10/11.
  36. de la Torre-Hernandez JM, Alfonso F, Hernandez F, Elizaga J, Sanmartin M, Pinar E, et al. Drug-eluting stent thrombosis: results from the multicenter Spanish registry ESTROFA (Estudio ESpanol sobre TROmbosis de stents FArmacoactivos). *Journal of the American College of Cardiology*. 2008;51(10):986-90. Epub 2008/03/08.
  37. Sleeper LA, Ramanathan K, Picard MH, Lejemtel TH, White HD, Dzavik V, et al. Functional status and quality of life after emergency revascularization for cardiogenic shock complicating acute myocardial infarction. *Journal of the American College of Cardiology*. 2005;46(2):266-73. Epub 2005/07/19.
  38. Lewis EF, Velazquez EJ, Solomon SD, Hellkamp AS, McMurray JJ, Mathias J, et al. Predictors of the first heart failure hospitalization in patients who are stable survivors of myocardial infarction complicated by pulmonary congestion and/or left ventricular dysfunction: a VALIANT study. *European heart journal*. 2008;29(6):748-56. Epub 2008/03/01.
  39. Airolidi F, Colombo A, Morici N, Latib A, Cosgrave J, Buellesfeld L, et al. Incidence and predictors of drug-eluting stent thrombosis during and after discontinuation of thienopyridine treatment. *Circulation*. 2007;116(7):745-54. Epub 2007/08/01.
  40. Tufts Medical Center Web Site. 2013 [cited 2013 December 1]; Available from: <https://research.tufts-nemc.org/cear4/SearchingtheCEARRegistry/SearchtheCEARRegistry.aspx>.

1  
2  
3 41. Roos JB, Doshi SN, Konorza T, Palacios I, Schreiber T, Borisenko OV, et al. The  
4 cost-effectiveness of a new percutaneous ventricular assist device for high-risk PCI  
5 patients: mid-stage evaluation from the European perspective. Journal of medical  
6 economics. 2013;16(3):381-90. Epub 2013/01/11.  
7  
8  
9  
10  
11  
12  
13  
14  
15  
16  
17  
18  
19  
20  
21  
22  
23  
24  
25  
26  
27  
28  
29  
30  
31  
32  
33  
34  
35  
36  
37  
38  
39  
40  
41  
42  
43  
44  
45  
46  
47  
48  
49  
50  
51  
52  
53  
54  
55  
56  
57  
58  
59  
60

Confidential

## Figure legends

**Figure 1. Simplified schematic of the decision model.** This figure illustrates important events and states captured in the model. All patients enter the Markov cohort after percutaneous coronary intervention for myocardial infarction. They are treated with acetylsalicylic acid and one of clopidogrel, prasugrel or ticagrelor with the aim of continuing 12 months of dual antiplatelet therapy. Patients could develop multiple adverse events, the most important of which are recurrent acute coronary syndromes and major bleeds. Patients could transition in and out of heart failure. The model also accounts for risk of death, which is related to age, gender, time since infarction, and presence of heart failure. Less severe adverse events are included in the model but not illustrated in this figure for parsimony.

**Figure 2. Cost effectiveness acceptability curve for ticagrelor vs. prasugrel vs. clopidogrel.** This figure illustrates the results of the probabilistic analysis based on 10,000 simulations. The graph plots the percentage of iterations (on the Y-Axis) in which clopidogrel, prasugrel, and ticagrelor are cost-effective against different thresholds for willingness to pay in Canadian Dollars (X-Axis).

Figures

Figure 1.

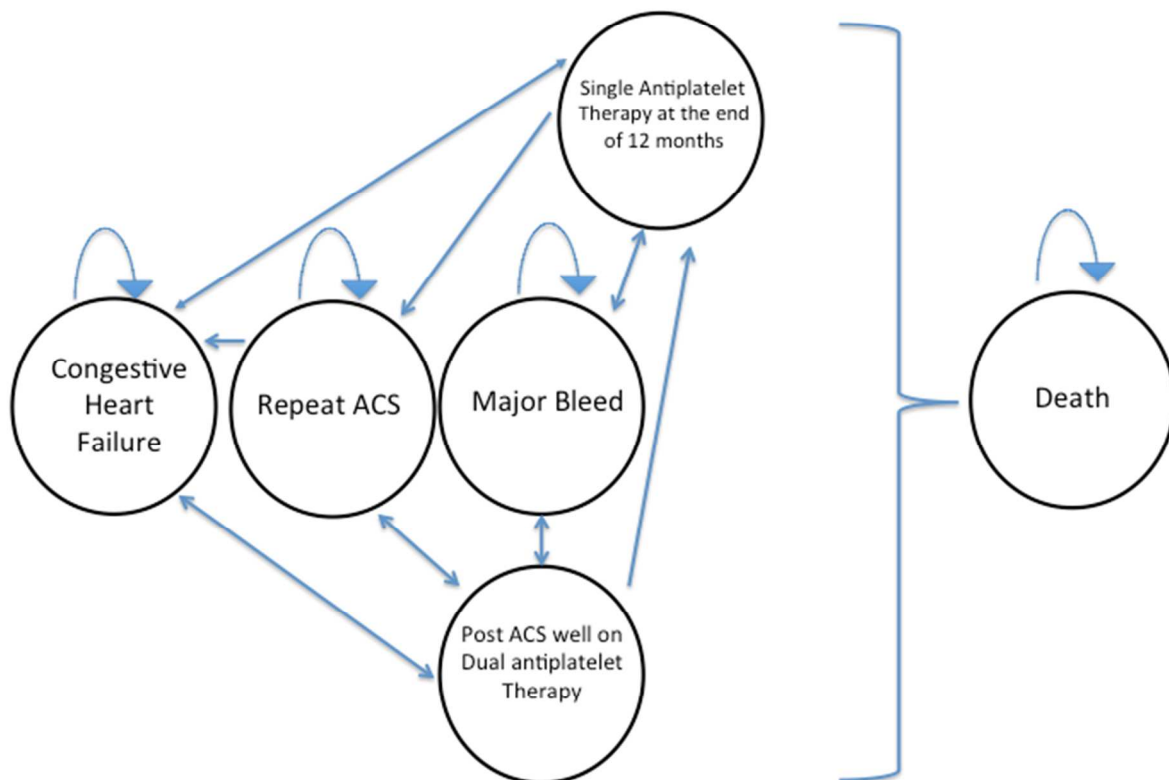

1  
2  
3  
4  
5  
6  
7  
8  
9  
10  
11  
12  
13  
14  
15  
16  
17  
18  
19  
20  
21  
22  
23  
24  
25  
26  
27  
28  
29  
30  
31  
32  
33  
34  
35  
36  
37  
38  
39  
40  
41  
42  
43  
44  
45  
46  
47  
48  
49  
50  
51  
52  
53  
54  
55  
56  
57  
58  
59  
60

Figure 2.

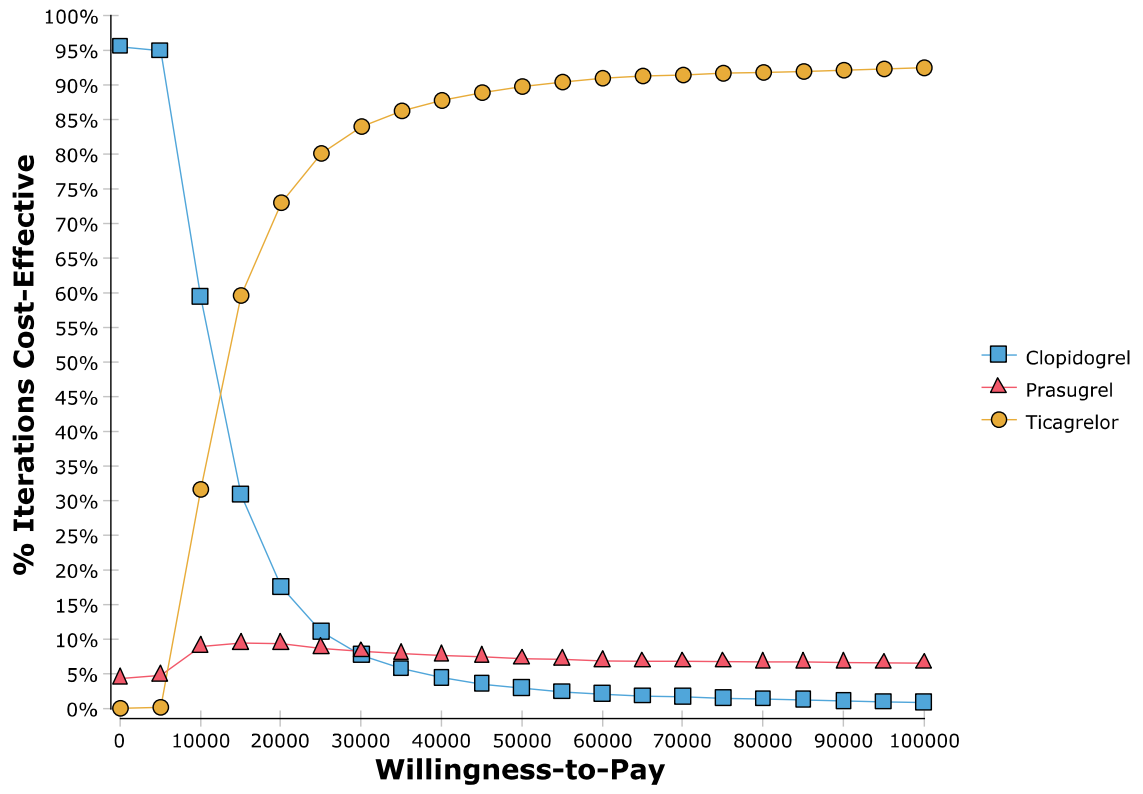

**Tables**

Confidential

1  
2  
3  
4  
5  
6  
7  
8  
9  
10  
11  
12  
13  
14  
15  
16  
17  
18  
19  
20  
21  
22  
23  
24  
25  
26  
27  
28  
29  
30  
31  
32  
33  
34  
35  
36  
37  
38  
39  
40  
41  
42  
43  
44  
45  
46  
47  
48  
49  
50  
51  
52  
53  
54  
55  
56  
57  
58  
59  
60

**Table 1.** The rates of important events/ state transitions that were used in the model (ACS – acute coronary syndrome)

| Parameter used in model                                             | Value            | Low Range of Sensitivity Analyses | High Range of Sensitivity Analyses | Distribution used in probabilistic analysis | Reference  |
|---------------------------------------------------------------------|------------------|-----------------------------------|------------------------------------|---------------------------------------------|------------|
| <b>Transition probabilities to and from heart failure</b>           |                  |                                   |                                    |                                             |            |
| Monthly incidence of heart failure with no recurrent ACS            | 0.50 %/23 months | 0                                 | 0.0006                             | Beta                                        | (35)       |
| Heart failure incidence in month after ACS without stent thrombosis | 4.60%            | 0.039                             | 0.053                              | Beta                                        | (35)       |
| Heart failure incidence in month after ACS with stent thrombosis    | 20%/month        | 0.155                             | 0.246                              | Beta                                        | (36)       |
| Probability of transition out of state of heart failure             | 57.40 %/year     | 0.488                             | 0.660                              | Beta                                        | (37)       |
| <b>Incidence of important clinical events</b>                       |                  |                                   |                                    |                                             |            |
| Incidence of recurrent ACS over one year                            | 7.48 %           | 0.071                             | 0.079                              | Beta                                        | (4)(5) (6) |
| Proportion of recurrent ACS due to stent thrombosis                 | 20%              | 0                                 | 49.70%                             | Beta                                        | (4)(5) (6) |
| Incidence of major bleed                                            | 3.9 %/year       | 0                                 | 0.255                              | Beta                                        | (4)(5) (6) |
| Incidence of discontinuing clopidogrel                              | 12.4 %/year      | 12.00%                            | 12.80%                             | Beta                                        | (4)(5) (6) |
| Incidence of discontinuing prasugrel                                | 14.1 %/year      | 13.30%                            | 14.90%                             | Beta                                        | (4)(5)     |
| Incidence of discontinuing ticagrelor                               | 13.9 %/year      | 13.40%                            | 14.40%                             | Beta                                        | (4)(6)     |
| Incidence of minor side effects with clopidogrel                    | 14 %/year        | 13.40%                            | 14.50%                             | Beta                                        | (4)(5) (6) |
| Incidence of minor side effects with prasugrel                      | 14.5 %/year      | 13.70%                            | 15.30%                             | Beta                                        | (4)(5)     |
| Incidence of minor side effects with ticagrelor                     | 19.8 %/year      | 19.00%                            | 20.60%                             | Beta                                        | (4)(6)     |



**Table 2. Hazard/ odds ratios for clinically important events as employed in the model (ACS – acute coronary syndrome, HR – hazard ratio, OR – odds ratio)**

| Hazard ratios and odds ratios                                            |                             |                                   |                                    |                                             |            |
|--------------------------------------------------------------------------|-----------------------------|-----------------------------------|------------------------------------|---------------------------------------------|------------|
| Parameter used in model                                                  | Value                       | Low Range of Sensitivity Analyses | High Range of Sensitivity Analyses | Distribution used in probabilistic analysis | Reference  |
| HR for death post ACS, years 0-5                                         | 4.39                        | 1.11                              | 17.39                              | Log-normal                                  | (18)       |
| HR for death post ACS, years 5-10                                        | 3.1                         | 0.93                              | 10.33                              | Log-normal                                  | (18)       |
| HR for death post ACS, years 10-15                                       | 2.25                        | 0.81                              | 6.23                               | Log-normal                                  | (18)       |
| HR for death post ACS, years 15-20                                       | 2.17                        | 0.80                              | 5.88                               | Log-normal                                  | (18)       |
| HR for death post ACS, years 20-25                                       | 2.07                        | 0.79                              | 5.43                               | Log-normal                                  | (18)       |
| HR for death post ACS, years 25-30                                       | 1                           | N/A                               | N/A                                | N/A                                         | Assumption |
| HR for death in the presence of heart failure relative to its absence    | 8.22                        | 7.49                              | 9.01                               | Log-normal                                  | (38)       |
| HR for death with clopidogrel relative to single antiplatelet            | 0.93 for 12 months          | 0.79                              | 1.08                               | Log-normal                                  | (19)       |
| HR for death with prasugrel relative to clopidogrel                      | 0.95                        | 0.78                              | 1.16                               | Log-normal                                  | (4)(5)     |
| HR for death with ticagrelor relative to clopidogrel                     | 0.78                        | 0.69                              | 0.90                               | Log-normal                                  | (4)(6)     |
| HR for ACS with aspirin and clopidogrel relative to aspirin alone        | 0.77 for 12 months post ACS | 0.67                              | 0.89                               | Log-normal                                  | (19)       |
| HR for ACS with prasugrel relative to clopidogrel                        | 0.75                        | 0.66                              | 0.85                               | Log-normal                                  | (4)(5)     |
| HR for ACS with ticagrelor relative to clopidogrel                       | 0.84                        | 0.74                              | 0.94                               | Log-normal                                  | (4)(6)     |
| OR for stent thrombosis with single antiplatelet relative to clopidogrel | 13.70 for 6 months post ACS | 4.04                              | 46.68                              | Log-normal                                  | (39)       |
| OR for stent thrombosis with prasugrel relative to clopidogrel           | 0.47                        | 0.35                              | 0.63                               | Log-normal                                  | (4)(5)     |
| OR for stent thrombosis with ticagrelor relative to clopidogrel          | 0.74                        | 0.58                              | 0.95                               | Log-normal                                  | (4)(6)     |
| OR for major bleeding with single antiplatelet relative to clopidogrel   | 0.88                        | 0.48                              | 1.64                               | Log-normal                                  | (19)       |
| OR for major bleeding with prasugrel relative to clopidogrel             | 1.46                        | 1.15                              | 1.85                               | Log-normal                                  | (4)(5)     |
| HR for major bleeding with ticagrelor relative to clopidogrel            | 1.09                        | 0.92                              | 1.14                               | Log-normal                                  | (4)(6)     |

**Table 3.** Utilities and costs used in the model

| Parameter used in model                                             | Value              | Low Range of Sensitivity Analyses | High Range of Sensitivity Analyses | Distribution used in probabilistic analysis | Reference        |
|---------------------------------------------------------------------|--------------------|-----------------------------------|------------------------------------|---------------------------------------------|------------------|
| <b>Utilities</b>                                                    |                    |                                   |                                    |                                             |                  |
| Utility of post ACS state in absence of heart failure               | 0.91               | 0.56                              | 1.00                               | Beta                                        | (23)             |
| Utility of post ACS state in presence of heart failure              | 0.55               | 0                                 | 1.00                               | Beta                                        | (23)             |
| Utility decrement associated with ACS                               | 0.18 for one month | 0.10                              | 0.26                               | Beta                                        | (40)             |
| Utility decrement associated with major bleed                       | 0.16 for one month | 0                                 | 0.57                               | Beta                                        | (25)             |
| Utility decrements of minor side effects                            | 0.02               | 0                                 | 0.18                               | Beta                                        | (40) (25)        |
| Utility decrement associated with twice daily dosing for ticagrelor | 0.0001             | 0                                 | 0.04                               | Beta                                        | Assumption       |
| <b>Costs</b>                                                        |                    |                                   |                                    |                                             |                  |
| Monthly cost of post ACS state in presence of heart failure         | \$361.25           | \$220                             | \$503                              | Gamma                                       | (41)             |
| Monthly cost of post ACS state in absence of heart failure          | \$165.25           | \$100                             | \$230                              | Gamma                                       | (41)             |
| Hospitalization cost of ACS hospitalization                         | \$9,774            | \$0                               | \$32,404                           | Gamma                                       | (21)             |
| Hospitalization cost of major bleed                                 | \$10,805           | \$0                               | \$38,255                           | Gamma                                       | (21)             |
| Physician billing during ACS hospitalization                        | \$1,461            | \$1,417                           | \$1,505                            | Gamma                                       | (22), assumption |
| Physician billing during hospitalization for major bleed            | \$588              | \$560                             | \$616                              | Gamma                                       | (22), assumption |
| Monthly cost of clopidogrel                                         | \$20.09            | \$15                              | \$25                               | N/A                                         | (20)             |
| Monthly cost of prasugrel                                           | \$80.96            | \$70                              | \$92                               | N/A                                         | (20)             |
| Monthly cost of ticagrelor                                          | \$90.10            | \$79                              | 101                                | N/A                                         | (20)             |

ACS= Acute coronary syndrome

**Table 4.** Summary of cost effectiveness analysis for the base case

| Strategy    | Cost (95% CI)*              | Incremental cost † | Effectiveness in QALYs (95% CI) | Incremental Effectiveness (QALY) | ICER (\$/QALY) † |
|-------------|-----------------------------|--------------------|---------------------------------|----------------------------------|------------------|
| Clopidogrel | 39,601<br>(8,343, 111,186)  | -                  | 7.41 (1.05, 14.79)              | -                                | -                |
| Prasugrel   | 40,422<br>(9,002, 112,574)  | 821                | 7.43<br>(1.06,14.79)            | 0.02                             | 57,630 ‡         |
| Ticagrelor  | 40,649<br>(9,327, 111, 881) | 227                | 7.50 (1.12, 14.84)              | 0.07                             | 12,205           |

\* All costs are in 2012 Canadian Dollars

† compared to common reference of clopidogrel

‡ extendedly dominated

QALYs = Quality-adjusted life years; ICER = Incremental Cost-effectiveness ratio

**Appendix 1.** Summary of the range of parameter values used in the one-way sensitivity analyses, along with the incremental cost effectiveness ratios obtained with the parameters values at the extreme values used in each one-way analysis (\* – compared to next less expensive agent. ICER= incremental cost effectiveness ratio; ACS= acute coronary syndrome)

| Variable                                                                           | Low range | ICER *, prasugrel | ICER *, ticagrelor | High range | ICER *, prasugrel | ICER *, ticagrelor |
|------------------------------------------------------------------------------------|-----------|-------------------|--------------------|------------|-------------------|--------------------|
| Starting age                                                                       | 37.50     | 143936            | 4475               | 86.50      | 24887             | 4056               |
| Proportion of males                                                                | 0.62      | 47718             | 3933               | 0.64       | 47529             | 3932               |
| <b>Transition probabilities to and from heart failure</b>                          |           |                   |                    |            |                   |                    |
| Monthly incidence of heart failure in the absence of recurrent ACS                 | 0.00      | 47640             | 3917               | 0.01       | 47621             | 4360               |
| Incidence of heart failure within 1 month after ACS without stent thrombosis       | 0.01      | 50801             | 3899               | 0.10       | 43568             | 3976               |
| Incidence of heart failure within 1 month after ACS with stent thrombosis          | 0.16      | 49582             | 3916               | 0.25       | 45829             | 3950               |
| Probability of transition from heart failure to being free of heart failure        | 0.49      | 46067             | 3976               | 0.66       | 4927              | 3895               |
| <b>Incidence of important clinical events</b>                                      |           |                   |                    |            |                   |                    |
| Incidence of recurrent ACS                                                         | 0.07      | 49229             | 3760               | 0.08       | 45934             | 4120               |
| Incidence of recurrent ACS in angioplasty without stenting                         | 0.03      | 47623             | 3933               | 0.07       | 47623             | 3933               |
| Proportion of recurrent ACS due to stent thrombosis                                | 0.00      | 55166             | 3874               | 0.50       | 36609             | 4065               |
| Incidence of major bleed                                                           | 0.00      | 32438             | 6723               | 0.26       | -13522            | 13935              |
| Incidence of discontinuing clopidogrel                                             | 0.12      | 47291             | 3932               | 0.13       | 47964             | 3934               |
| Incidence of discontinuing prasugrel                                               | 0.13      | 47198             | 3833               | 0.15       | 47977             | 4014               |
| Incidence of discontinuing ticagrelor                                              | 0.13      | 47474             | 3977               | 0.14       | 47772             | 3887               |
| Incidence of minor side effects with clopidogrel                                   | 0.13      | 47659             | 3933               | 0.15       | 47593             | 3933               |
| Incidence of minor side effects with prasugrel                                     | 0.14      | 47570             | 3934               | 0.15       | 47677             | 3932               |
| Incidence of minor side effects with ticagrelor                                    | 0.19      | 47628             | 3932               | 0.21       | 47616             | 3934               |
| <b>Hazard ratios and odds ratios</b>                                               |           |                   |                    |            |                   |                    |
| Hazard ratio for death post ACS, years 0-5                                         | 1.11      | 90517             | 3994               | 17.40      | 29914             | 3843               |
| Hazard ratio for death post ACS, years 5-10                                        | 0.93      | 47357             | 3822               | 10.33      | 47306             | 3839               |
| Hazard ratio for death post ACS, years 10-15                                       | 0.81      | 47700             | 3827               | 6.23       | 47515             | 3829               |
| Hazard ratio for death post ACS, years 15-20                                       | 0.80      | 47804             | 3828               | 5.88       | 47547             | 3828               |
| Hazard ratio for death post ACS, years 20-25                                       | 0.79      | 47828             | 3828               | 5.43       | 47656             | 3828               |
| Hazard ratio for death in the presence of heart failure relative to its absence    | 7.49      | 48680             | 3932               | 9.01       | 46600             | 3934               |
| Hazard ratio for death with clopidogrel relative to single antiplatelet            | 0.79      | 50299             | 3943               | 1.08       | 45125             | 3923               |
| Hazard ratio for death with prasugrel relative to clopidogrel                      | 0.78      | 14814             | 4045               | 1.16       | -3052             | 10842              |
| Hazard ratio for death with ticagrelor relative to clopidogrel                     | 0.69      | 52588             | 3923               | 0.90       | 3577              | 53780              |
| Hazard ratio for recurrent ACS in with aspirin and clopidogrel relative to aspirin | 0.67      | 48605             | 4336               | 0.89       | 47714             | 3990               |
| Hazard ratio for recurrent ACS with prasugrel relative to clopidogrel              | 0.66      | 39491             | 5321               | 0.85       | 57952             | 2438               |
| Hazard ratio for recurrent ACS with ticagrelor relative to clopidogrel             | 0.74      | 48421             | 2418               | 0.94       | 46834             | 5498               |
| Odds ratio for stent thrombosis with single antiplatelet relative to clopidogrel   | 4.04      | 47732             | 3927               | 46.68      | 47547             | 3936               |
| Odds ratio for stent thrombosis with prasugrel relative to clopidogrel             | 0.35      | 46744             | 3941               | 0.63       | 48804             | 3922               |
| Odds ratio for stent thrombosis with ticagrelor relative to clopidogrel            | 0.58      | 47714             | 3921               | 0.95       | 47510             | 3948               |

|                                                                                |         |          |         |          |          |          |
|--------------------------------------------------------------------------------|---------|----------|---------|----------|----------|----------|
| Odds ratio for major bleeding with single antiplatelet relative to clopidogrel | 0.48    | 47663    | 3768    | 1.64     | 47548    | 4246     |
| Odds ratio for major bleeding with prasugrel relative to clopidogrel           | 1.15    | 37647    | 6212    | 1.85     | 60318    | 1076     |
| Hazard ratio for major bleeding with ticagrelor relative to clopidogrel        | 0.92    | 47896    | 3189    | 1.14     | 47295    | 4826     |
| <b>Utilities</b>                                                               |         |          |         |          |          |          |
| Utility of post ACS state in absence of heart failure                          | 0.56    | 78808    | 6200    | 1.00     | 43392    | 3485     |
| Utility of post ACS state in presence of heart failure                         | 0.01    | 45993    | 3927    | 0.99     | 49350    | 3750     |
| Utility decrement associated with ACS                                          | -0.26   | 47210.41 | 3939.04 | -0.10    | 48045.55 | 3927.33  |
| Utility decrement associated with major bleed                                  | -0.57   | 48682.90 | 3917.30 | 0.00     | 47222.58 | 3939.43  |
| Utility decrements of minor side effects                                       | -0.18   | 47743.89 | 3992.70 | 0.00     | 47608.58 | 3925.88  |
| Utility decrement associated with twice daily dosing for ticagrelor            | -0.04   | 39337.61 | 9535.17 | 0.00     | 47920.45 | 3866.38  |
| <b>Costs</b>                                                                   |         |          |         |          |          |          |
| Monthly cost of post ACS state in presence of heart failure                    | 220.00  | 47737.15 | 3859.10 | 503.00   | 47492.26 | 4018.85  |
| Monthly cost of post ACS state in absence of heart failure                     | 100.00  | 46903.85 | 2972.17 | 230.00   | 48658.46 | 4677.67  |
| Hospitalization cost of ACS hospitalization                                    | 0.00    | 60196.03 | 1859.20 | 32404.00 | 18514.24 | 8735.16  |
| Hospitalization cost of major bleed                                            | 0.00    | 33525.35 | 6561.80 | 38255.00 | -3280.38 | 12555.47 |
| Physician billing during ACS hospitalization                                   | 1417.00 | 47841.13 | 3818.86 | 1505.00  | 47727.93 | 3837.54  |
| Physician billing during hospitalization for major bleed                       | 560.00  | 47745.90 | 3835.40 | 616.00   | 47823.17 | 3820.99  |
| Monthly cost of clopidogrel                                                    | 15.00   | 51359.88 | 3934.07 | 25.00    | 44019.40 | 3932.34  |
| Monthly cost of prasugrel                                                      | 70.00   | 38591.34 | 6046.17 | 92.00    | 56721.74 | 1804.79  |
| Monthly cost of ticagrelor                                                     | 79.00   | 48453.12 | 1768.06 | 101.00   | 46808.98 | 6059.31  |
